# Supplementary material for: Jasmonates Promote β-Amylase-Mediated Starch Degradation to Confer Cold Tolerance in Tomato Plants
Source: MDPI journal article supplement (doi:10.3390/plants13081055), 2024-04-09
Supplement: s1 [file s1]

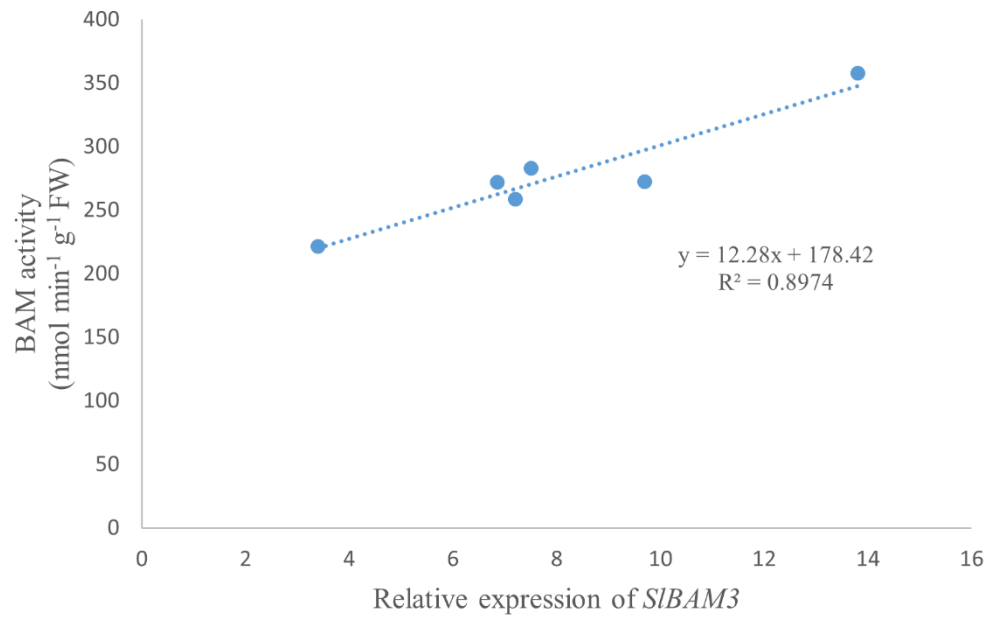

Supplementary Figure S1. Relative expression of *S/BAM3* correlates with BAM activity. Data used for correlation analysis were from Figures 1 and 5.
